# Supplementary material for: The effect of post-activation enhancement on the performance of Chinese national skeleton athletes in the “ice push sled”-a first cross-sectional study
Source: PeerJ. 2024 Oct 2;12:e18271. doi: 10.7717/peerj.18271 (PMC11453157; doi:10.7717/peerj.18271)
Supplement: Supplemental Information 1 [file peerj-12-18271-s001.xlsx]

## Sheet: Push
		participant	PUSH-No	PUSH-25%	PUSH-50%	PUSH-75%
		1	4.74	4.7	4.69	4.72
		2	4.82	4.79	4.78	4.77
		3	4.8	4.76	4.74	4.76
		4	5.25	5.19	5.18	5.2
		5	5.25	5.25	5.22	5.23
		6	5.3	5.3	5.25	5.28
		7	5.37	5.38	5.3	5.35
		M	5.07571	5.05286	5.02286	5.04429
		SD	0.2744	0.290156	0.271337	0.279575

## Sheet: morning pulse
	participant	0	25	50	75
	1	48	50	46	47
	2	50	51	49	50
	3	47	49	47	46
	4	58	57	60	58
	5	58	56	55	57
	6	63	63	64	63
	7	56	55	56	58
	M	54.2857	54.4286	53.8571	54.1429
	SD	6.01981	4.89412	6.81734	6.46603

## Sheet: CK、BU
			BU						CK
		participant	0	25	50	75			0	25	50	75
		1	7.1	6.97	7.23	6.89			169	149	160	155
		2	6.28	6.43	6.23	6.73			189	198	210	198
		3	6.24	5.91	6.56	6.36			223	237	218	206
		4	6.9	7.1	7.13	7.02			89	93	99	101
		5	6.2	6.37	6.12	6.32			140	136	148	150
		6	6.32	6.14	6.4	6.2			150	157	152	146
		7	5.91	5.8	5.98	5.78			128	114	138	139
		M	6.42143	6.38857	6.52143	6.47143			155.429	154.857	160.714	156.429
		SD	0.420968	0.49724	0.487833	0.43399			43.416	49.1577	41.3792	35.8555

## Sheet: Warm-up heart rate
participant	≤60	60-70	70-80	80-90	90+		participant	≤60	60-70	70-80	80-90	90+			participant	≤60	60-70	70-80	80-90	90+			participant	≤60	60-70	70-80	80-90	90+
1	14	18	4	4			1	13	19	5	3				1	15	17	6	2				1	13	18	7	2
2	16	16	5	3			2	13	18	5	4				2	16	15	6	3				2	15	16	7	2
3	10	18	10	2			3	10	15	13	2				3	15	15	6	4				3	14	14	8	4
4	6	8	12	14			4	7	9	15	9				4	6	13	12	9				4	8	11	14	7
5	13	15	8	4			5	14	11	10	5				5	11	11	12	6				5	11	12	10	7
6	18	12	8	2			6	16	14	9	1				6	19	10	7	4				6	17	10	9	4
7	12	13	10	5			7	10	15	9	6				7	12	14	11	3				7	10	14	10	6
M	12.7143	14.2857	8.14286	4.85714			M	11.8571	14.4286	9.42857	4.28571				M	13.4286	13.5714	8.57143	4.42857				M	12.5714	13.5714	9.28571	4.57143
SD	3.94606	3.59232	2.85357	4.18045			SD	3.02372	3.55233	3.73529	2.69037				SD	4.1975	2.43975	2.93582	2.37045				SD	3.10146	2.82	2.42997	2.1492
